# Supplementary material for: The association of parity/live birth number with incident type 2 diabetes among women: over 15 years of follow-up in The Tehran Lipid and Glucose Study
Source: PubMed Central journal article supplement (PMC8556972; doi:10.1186/s12905-021-01519-7), 2021-10-29
Supplement: 12905_2021_1519_MOESM1_ESM.pdf [file 12905_2021_1519_MOESM1_ESM.pdf]

In the Name of God
Shaheed Beheshti University of Medical Sciences
Endocrine Research Center

Tehran Lipid and Glucose Prospective Study General Questionnaire

Note: Each question is specific to a special sex and age group.

A) Questions on demographic characteristics:

- 1- Family name: 2- Name: 3- Father's name:
4- Address:
5- Where do you work?(address)

6- Close relative Tel:
7- Date of interview:
8- Admission No:
9- Household No:
10- Cluster No:
11- Identification No:
12- Birth Date according to Identification document:dd/mm/yy

| A) Questions on demographic characteristics:                                                                                                                                                                                                                   |                                                                                                                               |
|----------------------------------------------------------------------------------------------------------------------------------------------------------------------------------------------------------------------------------------------------------------|-------------------------------------------------------------------------------------------------------------------------------|
| <b>13- Actual birth date: dd/mm/yy</b>                                                                                                                                                                                                                         | <input type="text"/> <input type="text"/> <input type="text"/> <input type="text"/> <input type="text"/> <input type="text"/> |
| <b>14- Age:</b>                                                                                                                                                                                                                                                | <input type="text"/> <input type="text"/>                                                                                     |
| <b>15- Sex</b><br>1- Male<br>2- Female                                                                                                                                                                                                                         | <input type="checkbox"/>                                                                                                      |
| <b>16- Marital status</b><br>1- Single<br>2- Married<br>3- Divorced<br>4- Widowed                                                                                                                                                                              | <input type="checkbox"/>                                                                                                      |
| <b>17- Literacy (&gt;6 years old)</b><br>1- Illiterate<br>2- Literate                                                                                                                                                                                          | <input type="checkbox"/>                                                                                                      |
| <b>18- Are you engaged in educational programs now (&gt;6 years old)?</b><br>1-Yes<br>2- No                                                                                                                                                                    | <input type="checkbox"/>                                                                                                      |
| <b>19- What is your educational Level (&gt;6 years old)?</b><br>1- Primary School<br>2- 6-8 th grader<br>3- 9-11 th grader<br>4- Technician<br>5- Bachelor<br>6- Master<br>7- GP<br>8- Specialist<br>9- Sub specialist<br>10- Nehzat<br>11- Religious Sciences | <input type="text"/> <input type="text"/>                                                                                     |

| <b>A) Questions on demographic characteristics:</b>                                                                                                                                                                                                                                                                                                                                                                                |                                                         |
|------------------------------------------------------------------------------------------------------------------------------------------------------------------------------------------------------------------------------------------------------------------------------------------------------------------------------------------------------------------------------------------------------------------------------------|---------------------------------------------------------|
| <p><b>20- What is your highest educational certificate (go to question 21)?</b></p> <p>1- Primary School      7- Master<br/>                     2- 6-8th grade        8- General practitioner<br/>                     3- 9-11th grade      9- Specialist<br/>                     4- High school        10- Nehzat<br/>                     5- Technician        11- Religious Sciences<br/>                     6- Bachelor</p> | <input style="width: 40px; height: 20px;" type="text"/> |
| <p><b>21- What has your occupational status been during the past month (&gt;10 years old) ?</b></p> <p>1- Employed            4- Housewife<br/>                     2- Unemployed        5- Unemployed, having income<br/>                     3- Student            6- Others</p> <p>Note: If you choose any of No. 2,3,4,5,6 go to question 24.</p>                                                                              | <input style="width: 30px; height: 20px;" type="text"/> |
| <p><b>22- What is your job position (&gt;10 years old)?</b></p>                                                                                                                                                                                                                                                                                                                                                                    | <p>.....</p>                                            |
| <p><b>23- What is your job group?</b></p>                                                                                                                                                                                                                                                                                                                                                                                          | <p>.....</p>                                            |
| <p><b>24- How many years have you been residing in Tehran (as a permanent resident)?</b></p>                                                                                                                                                                                                                                                                                                                                       | <p>.....</p>                                            |

| <b>B) Questions about past medical history:</b>                                                                                                                                                                                                                                                                                                                                                                                                                                                                                                                                                                                                                                                                                                                                                                                                                                                  |                                                                                                               |
|--------------------------------------------------------------------------------------------------------------------------------------------------------------------------------------------------------------------------------------------------------------------------------------------------------------------------------------------------------------------------------------------------------------------------------------------------------------------------------------------------------------------------------------------------------------------------------------------------------------------------------------------------------------------------------------------------------------------------------------------------------------------------------------------------------------------------------------------------------------------------------------------------|---------------------------------------------------------------------------------------------------------------|
| <p><b>1- Have you ever been informed about following disorders by a physician?</b><br/>                     1- Yes    2- No    9- Don't know<br/>                     1-1 Hyperlipidemia<br/>                     1-2 Hyperglycemia<br/>                     1-3 Hypertension<br/>                     1-4 Ischemic heart disease<br/>                     Please explain:.....<br/>                     1-5 Non-Ischemic heart disease<br/>                     Please explain:.....<br/>                     1-6 Have you had past history of chronic diarrhoea?<br/>                     1-7 Have you experienced significant weight loss during previous 6 months?<br/>                     1-8 Stroke<br/>                     1-9 Malignant Disorders<br/>                     1-10 Have you ever had a major and important medical problem?<br/>                     Address it:.....</p> | <p><input type="checkbox"/>    <input type="checkbox"/> <input type="checkbox"/> <input type="checkbox"/></p> |
| <p><b>2- Have you ever been hospitalized so far?</b><br/>                     1-Yes: Please explain:<br/>                     2- No(go to question 4)</p>                                                                                                                                                                                                                                                                                                                                                                                                                                                                                                                                                                                                                                                                                                                                        | <p><input type="checkbox"/></p>                                                                               |
| <p><b>3- Have you been hospitalized during the last 3 months?</b><br/>                     1- Yes                      2- No</p>                                                                                                                                                                                                                                                                                                                                                                                                                                                                                                                                                                                                                                                                                                                                                                 | <p><input type="checkbox"/></p>                                                                               |
| <p><b>4- Is there any history of MI, stroke or sudden death, in your mother's/ sister's/ daughter's past medical history, under the age of 65?</b><br/>                     1- Yes                      2- No                      3- Don't know</p>                                                                                                                                                                                                                                                                                                                                                                                                                                                                                                                                                                                                                                             | <p><input type="checkbox"/></p>                                                                               |

| <b>B) Questions about past medical history:</b>                                                                                                                                                                                                                                                                                                                                                                                                                                                        |                                                   |
|--------------------------------------------------------------------------------------------------------------------------------------------------------------------------------------------------------------------------------------------------------------------------------------------------------------------------------------------------------------------------------------------------------------------------------------------------------------------------------------------------------|---------------------------------------------------|
| <p><b>5- Is there any history of MI, stroke or sudden death, in your father's/ brother's/ son's past medical history, under the age of 55?</b><br/>1- Yes      2- No      3- Don't know</p>                                                                                                                                                                                                                                                                                                            | <input type="checkbox"/>                          |
| <p><b>6- Has any of your first-degree relatives ( father, mother, brother, sister, son, daughter ) had diabetes mellitus?</b><br/>1- Yes      2- No      3- Don't know</p>                                                                                                                                                                                                                                                                                                                             | <input type="checkbox"/>                          |
| <p><b>7- Have you ever taken any of following medications during the last month (Oral or injection)?</b><br/>1-Yes regularly      2- No<br/>3- Yes, irregularly      4- Don't know</p> <p>7-1) Antidiabetic drugs<br/>7-2) Antihyperlipidemic drugs<br/>7-3) Diuretics<br/>7-4) <math>\beta</math>- blockers<br/>7-5) Antihypertensive drugs<br/>7-6) Corticosteroids<br/>7-7) Female hormones<br/>7-8) Male hormones<br/>7-9) Thyroid drugs<br/>7-10) Antithyroid drugs<br/>7-11) Aspirin (A.S.A)</p> | <input type="checkbox"/> <input type="checkbox"/> |

| C) Questions on personal habits:                                                                                                                                         |                                                                                                                                                                                                          |
|--------------------------------------------------------------------------------------------------------------------------------------------------------------------------|----------------------------------------------------------------------------------------------------------------------------------------------------------------------------------------------------------|
| <b>1-Do you smoke cigarettes?</b><br>1- Yes, regularly      2- No (go to question 3)<br>3- Yes, irregularly (go to question 3)                                           | <input type="checkbox"/>                                                                                                                                                                                 |
| <b>2-On the average , how many cigarettes do you smoke per day ?</b><br>1) 1-5   2) 6-10   3) 11-15   4) 16-20   5) >20<br>6) insufficient data<br>Then go to question 5 | <input type="checkbox"/>                                                                                                                                                                                 |
| <b>3- Have you ever smoked cigarettes in the past?</b><br>1- Yes, regularly      2- No (go to question 6)<br>3- Yes, irregularly (go to question 6)                      | <input type="checkbox"/>                                                                                                                                                                                 |
| <b>4- How many years have you stopped smoking?</b><br>(99- Don't know)                                                                                                   | <input style="width: 20px; height: 20px; border: 1px solid black; border-right: none;" type="text"/> <input style="width: 20px; height: 20px; border: 1px solid black; border-left: none;" type="text"/> |
| <b>5- How old were you when you first started to smoke regularly? ( 99- Don't know)</b>                                                                                  | <input style="width: 20px; height: 20px; border: 1px solid black; border-right: none;" type="text"/> <input style="width: 20px; height: 20px; border: 1px solid black; border-left: none;" type="text"/> |
| <b>6- Do you smoke pipe now?</b><br>1- Yes, regularly      2- No (go to question 9)<br>3- Yes, irregularly                                                               | <input type="checkbox"/>                                                                                                                                                                                 |
| <b>7- How many days does a pack of pipe tobacco last?</b><br>( 99- Don't know)                                                                                           | <input style="width: 20px; height: 20px; border: 1px solid black; border-right: none;" type="text"/> <input style="width: 20px; height: 20px; border: 1px solid black; border-left: none;" type="text"/> |

| C) Questions on personal habits:                                                                                                     |                                           |
|--------------------------------------------------------------------------------------------------------------------------------------|-------------------------------------------|
| <p><b>8- How old were you when you first started to smoke pipe?</b><br/>( 99- Don't know)</p>                                        | <input type="text"/> <input type="text"/> |
| <p><b>9- Have you ever smoked a pipe in the past?</b><br/>1- Yes, regularly      2- No<br/>3- Yes, irregularly</p>                   | <input type="checkbox"/>                  |
| <p><b>10- Do you smoke hookah (ghalian) ?</b><br/>1- Yes, regularly      2- No (go to question 13)<br/>3- Yes, irregularly</p>       | <input type="checkbox"/>                  |
| <p><b>11- How many days does a pack of tobacco last for hookah (ghalian) ?</b> ( 99- Don't know )</p>                                | <input type="text"/> <input type="text"/> |
| <p><b>12- How old were you when you first started to smoke hookah (ghalian) ?</b> ( 99- Don't know )<br/>Then go to question 14.</p> | <input type="text"/> <input type="text"/> |
| <p><b>13- Have you ever smoked hookah (ghalian) in the past?</b><br/>1- Yes, regularly      2- No      3- Yes, irregularly</p>       | <input type="checkbox"/>                  |
| <b>The following questions are asked from all age groups:</b>                                                                        |                                           |
| <p><b>14- Is there any cigarette smoker in your house that you inhale his/ her tobacco smoke?</b><br/>1- Yes      2- No</p>          | <input type="checkbox"/>                  |



**C) Questions on personal habits:**

The following questions are asked from persons >15 years old

|                                                                                                                                                                                                                                    |                          |
|------------------------------------------------------------------------------------------------------------------------------------------------------------------------------------------------------------------------------------|--------------------------|
| <b>20- Compared to other people in your age and sex, how would you rate your physical activity at work?</b><br>1- More active                      2- About the same<br>3- Less active                        4- Not applicable    | <input type="checkbox"/> |
| <b>21- Compared to other people in your age and sex how would you rate your physical activity out of work?</b><br>1- More active                      2- About the same<br>3- Less active                        4- Not applicable | <input type="checkbox"/> |
| <b>22- Do you regularly engage in strenuous activities or hard physical labour?</b><br>1- Yes                                      2- No                                                                                           | <input type="checkbox"/> |
| <b>23- Do you exercise or labour at least three times a week?</b><br>1- Yes                                      2- No                                                                                                             | <input type="checkbox"/> |



**D) Questions on chest pain and claudication:**

**7- Can you show me where the pain was?**  
1- Sternum (upper or middle)      2- Sternum (lower)  
3- Left anterior chest              4- Left arm  
5- other  
Record all areas mentioned.

.....

**8- Do you feel it anywhere else?**  
1-Yes                                      2- No  
If yes record additional information above.

**Section B: Possible infarction**

**9- Have you ever had a severe pain across the front of your chest lasting for half an hour or more?**  
1-Yes                                      2- No

**Section C: Intermittent claudication**  
*If an answer is recorded in a box no further questions need to be asked.*

**10- Do you get pain in either leg on walking?**  
1-Yes                                      2- No



| <b><i>E) The following questions are asked from women only:</i></b>                                                                                                                                                                                                                                                                                                                                                                                                                |                                                                                                                                  |
|------------------------------------------------------------------------------------------------------------------------------------------------------------------------------------------------------------------------------------------------------------------------------------------------------------------------------------------------------------------------------------------------------------------------------------------------------------------------------------|----------------------------------------------------------------------------------------------------------------------------------|
| <p><b>1-Do you have normal menstrual cycles?<br/>( for cases &gt;10years of age )</b><br/>                     1- Yes, naturally without taking control pills (go to question 5)<br/>                     2- No (go to question 13)<br/>                     3- Prepubertal age (go to physical exam section)<br/>                     4- Yes, but with hormone replacement pills</p>                                                                                              | <input type="checkbox"/>                                                                                                         |
| <p><b>2-Are you currently taking any hormone replacement medication?</b><br/>                     1- Estrogen    2- Progesterone    3-Both    4-None</p>                                                                                                                                                                                                                                                                                                                           | <input type="checkbox"/>                                                                                                         |
| <p><b>3- For how long has your menstrual cycles stopped?<br/>(Cases &gt;15 years of ages) ( Month and year)</b></p>                                                                                                                                                                                                                                                                                                                                                                | <p><b>Year</b>    <input type="text"/> <input type="text"/></p> <p><b>Month</b>    <input type="text"/> <input type="text"/></p> |
| <p><b>4- What is the reason of your menstrual cycles stopping?</b><br/>                     1- Natural menopause<br/>                     2- Early-onset menopause<br/>                     3- Hysterectomy without oophorectomy or unilateral oophorectomy<br/>                     4- Hysterectomy + bilateral oophorectomy<br/>                     5- Bilateral oophorectomy without hysterectomy<br/>                     6- Other<br/>                     7- Don't know</p> | <input type="checkbox"/>                                                                                                         |

***E) The following questions are for married women only:***

|                                                                                                                                                                                                              |                                           |
|--------------------------------------------------------------------------------------------------------------------------------------------------------------------------------------------------------------|-------------------------------------------|
| <p><b>5- Which contraception method have you used during the last three months?</b><br/>           1-LD contraceptive      2-HD contraceptive<br/>           3-Minipill                4- Triphasic pill</p> | <input type="checkbox"/>                  |
| <p><b>6- Are you pregnant now?</b><br/>           1-Yes      2-No      3-Don't know</p>                                                                                                                      | <input type="checkbox"/>                  |
| <p><b>7- Have you ever been pregnant?</b><br/>           1- Yes                      2-No (go to physical exam section)</p>                                                                                  | <input type="checkbox"/>                  |
| <p><b>8- How many live born children have you had?</b></p>                                                                                                                                                   | <input type="text"/> <input type="text"/> |
| <p><b>9- Have you given birth to a baby in the past one year?</b><br/>           1- Yes                      2-No</p>                                                                                        | <input type="checkbox"/>                  |
| <p><b>10- Have you ever had any abortion?</b><br/>           1- Yes                      2- No (go to question 14)</p>                                                                                       | <input type="checkbox"/>                  |
| <p><b>11- How many abortions have you had?</b></p>                                                                                                                                                           | <input type="text"/>                      |
| <p><b>12- Do you have any history of stillbirth?</b><br/>           1- Yes                      2- No (go to question 14)</p>                                                                                | <input type="checkbox"/>                  |

***F) The following questions are for married women only:***

|                                                                                                                                                                                                           |                                           |
|-----------------------------------------------------------------------------------------------------------------------------------------------------------------------------------------------------------|-------------------------------------------|
| <p><b>13- How many stillbirths have you ever experienced?</b></p>                                                                                                                                         | <input type="text"/> <input type="text"/> |
| <p><b>14- Has a doctor ever told you that you had hypertension or convulsion during any of your pregnancies?</b><br/>1- Yes                      2- No                      3- Unknown</p>                | <input type="checkbox"/>                  |
| <p><b>15- Has a doctor ever told you that you had high blood glucose or gestational diabetes during any of your pregnancies?</b><br/>1-Yes                      2- No                      3- Unknown</p> | <input type="checkbox"/>                  |
| <p><b>16- Have you ever had a baby that weighed 4.5 Kg or more?</b><br/>1-Yes                      2- No                      3- Unknown</p>                                                              | <input type="checkbox"/>                  |
| <p><b>17- Are you breast-feeding now?</b><br/>1-Yes                      2- No                      3- Unknown</p>                                                                                        | <input type="checkbox"/>                  |

| <b>G) Physical Examination Summary:</b>                                                                      |                                                                                     |
|--------------------------------------------------------------------------------------------------------------|-------------------------------------------------------------------------------------|
| <b>1- Pulse per minute:</b>                                                                                  | <input type="text"/> <input type="text"/>                                           |
| <b>2-Sphygmomanometer's cuff size:</b><br>1-Small                      2-Medium                      3-Large | <input type="checkbox"/>                                                            |
| <b>3- Systolic blood pressure (mmHg), first measurement:</b>                                                 | <input type="text"/> <input type="text"/> <input type="text"/>                      |
| <b>4-Diastolic blood pressure (mmHg), first measurement:</b>                                                 | <input type="text"/> <input type="text"/> <input type="text"/>                      |
| <b>5- Systolic blood pressure (mmHg), second measurement:</b>                                                | <input type="text"/> <input type="text"/> <input type="text"/>                      |
| <b>6- Diastolic blood pressure (mmHg), second measurement:</b>                                               | <input type="text"/> <input type="text"/> <input type="text"/>                      |
| <b>7- The time of first blood pressure measurement:</b>                                                      | <input type="text"/> <input type="text"/> <input type="text"/> <input type="text"/> |
| <b>8- Room temperature (°C)</b>                                                                              | <input type="text"/> <input type="text"/>                                           |
| <b>9- Goiter</b><br>1- Yes                      2- No                                                        | <input type="checkbox"/>                                                            |

| <b>G) Physical Examination Summary:</b>                                                                                                                                                                                                                                                            |                                                                                                                                          |
|----------------------------------------------------------------------------------------------------------------------------------------------------------------------------------------------------------------------------------------------------------------------------------------------------|------------------------------------------------------------------------------------------------------------------------------------------|
| <p><b>10- Goiter grading</b><br/>                     1- Grade I                      2- Grade II</p>                                                                                                                                                                                              | <input type="checkbox"/>                                                                                                                 |
| <p><b>11- Thyroid nodule</b><br/>                     1- Yes                              2- No</p>                                                                                                                                                                                                | <input type="checkbox"/>                                                                                                                 |
| <p><b>12-Anthropometry</b><br/>                     1- Height (cm)<br/>                     2- Weight (kg)<br/>                     3- Waist circumference (cm)<br/>                     4- Hip circumference (cm)<br/>                     5- Wrist circumference (cm with one decimal digit)</p> | <p>.....<br/>                     .....<br/>                     .....<br/>                     .....<br/>                     .....</p> |
